# Supplementary material for: Chemoprevention of Colon Cancer by DFMO, Sulindac, and NO-Sulindac Administered Individually or in Combinations in F344 Rats
Source: MDPI journal article supplement (doi:10.3390/cancers15154001), 2023-08-07
Supplement: s1 [file s1]

## *Supplementary Materials*

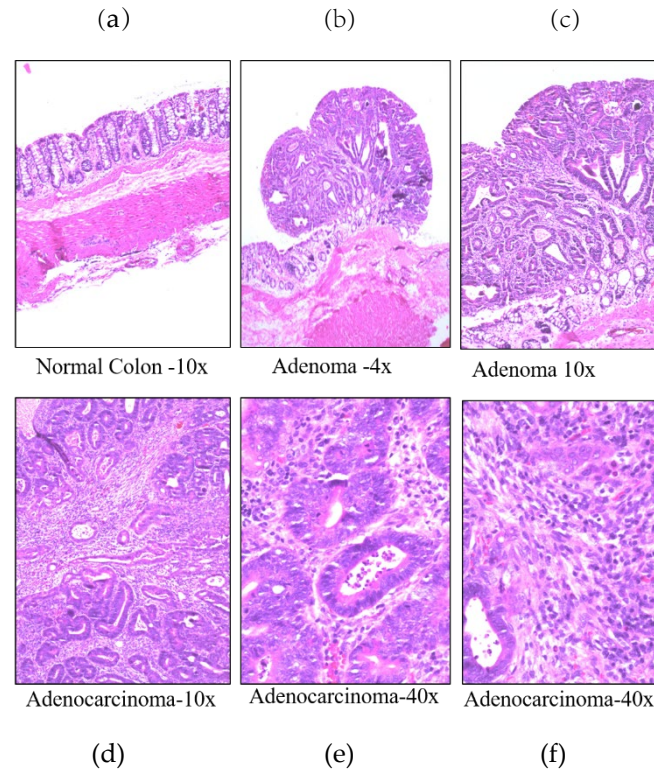

Supplementary Figure S1. Azoxymethane-induced rat colonic tumor histologies. (a) Normal Colon (10X); (b) Adenoma (4X); (c) Adenoma (10X); (d) Adenocarcinoma (ADAC, 10X); (e,f) ADCA 40X.

**Figure S2: Chemoprevention of Colon Cancer by DFMO, Sulindac, and NO-Sulindac administered individually or in combinations in F344 rats**  
**Western blot replicates**

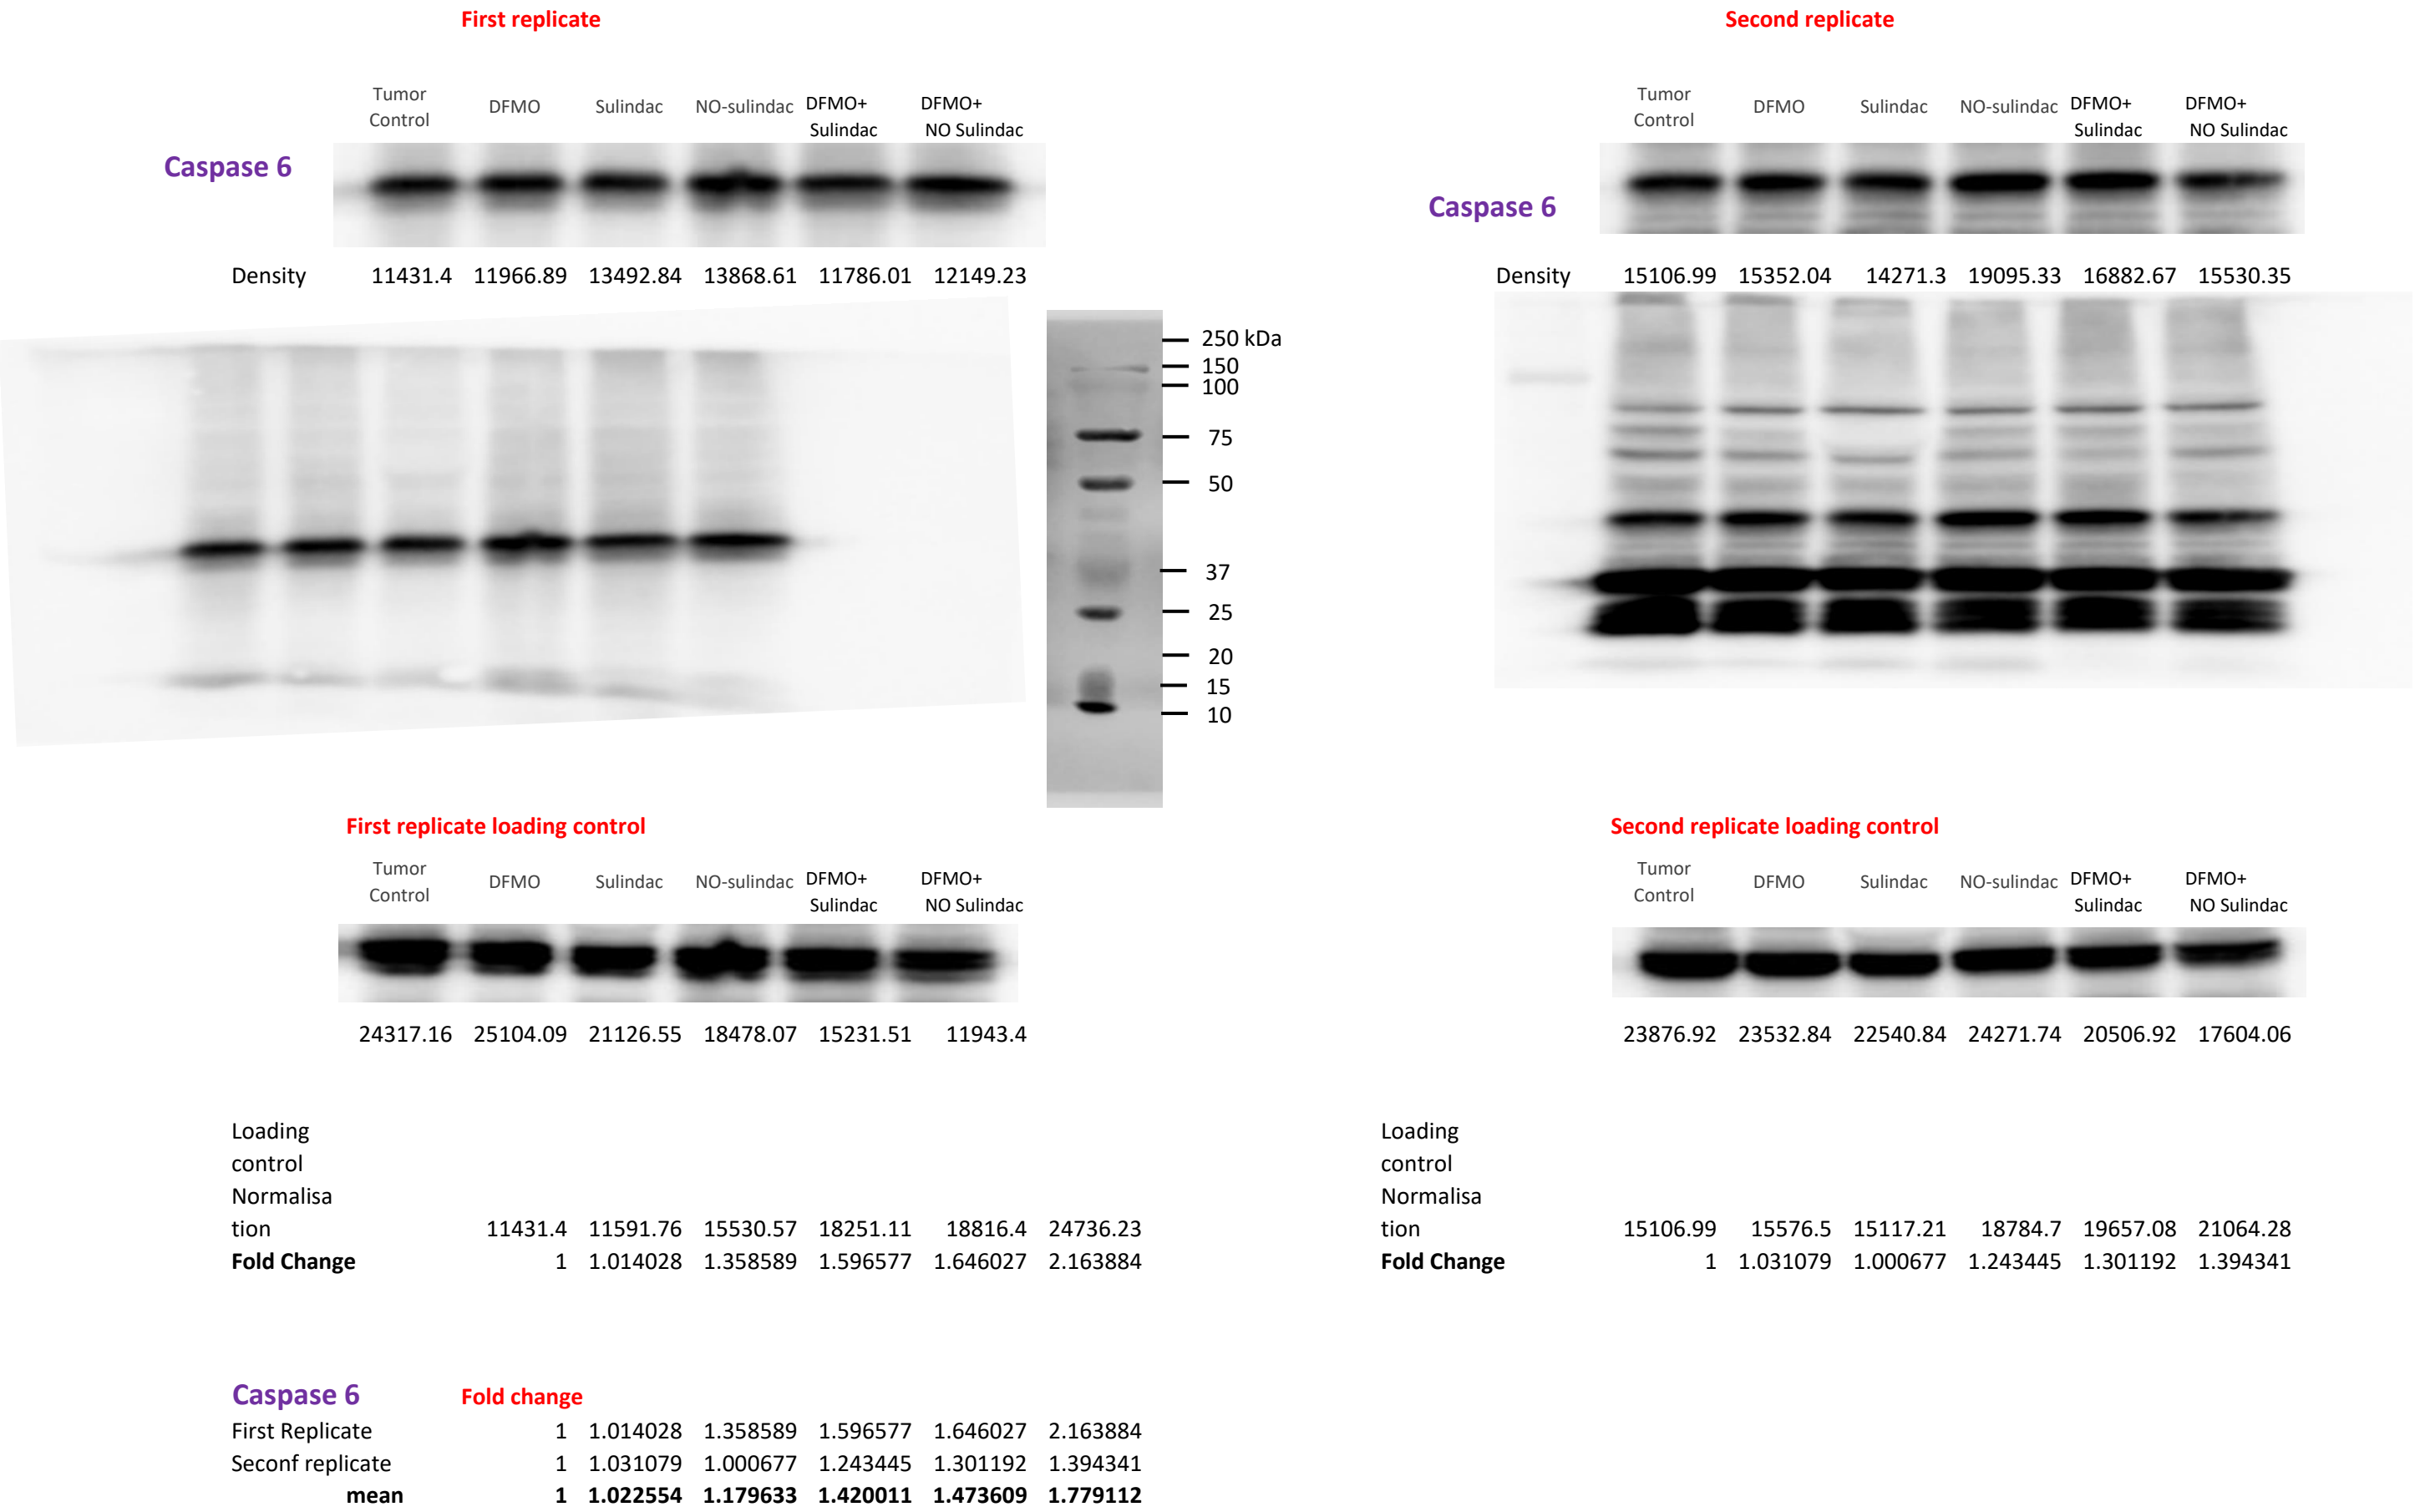

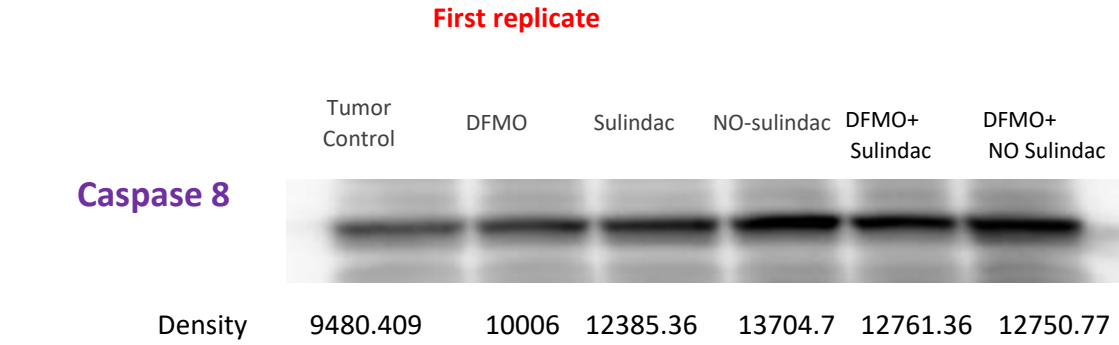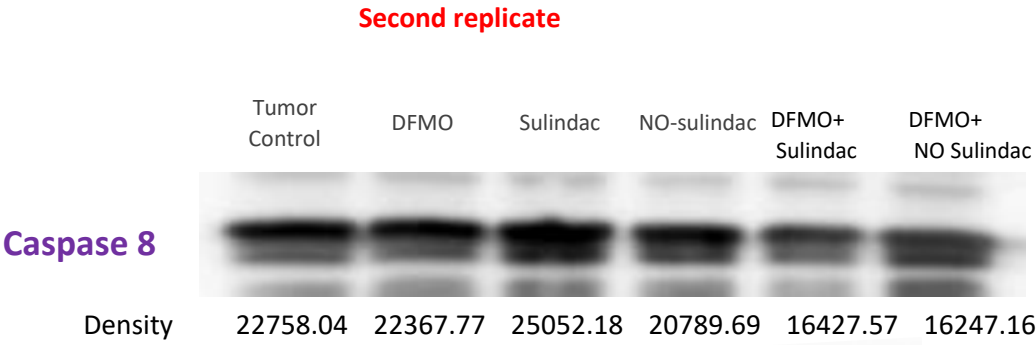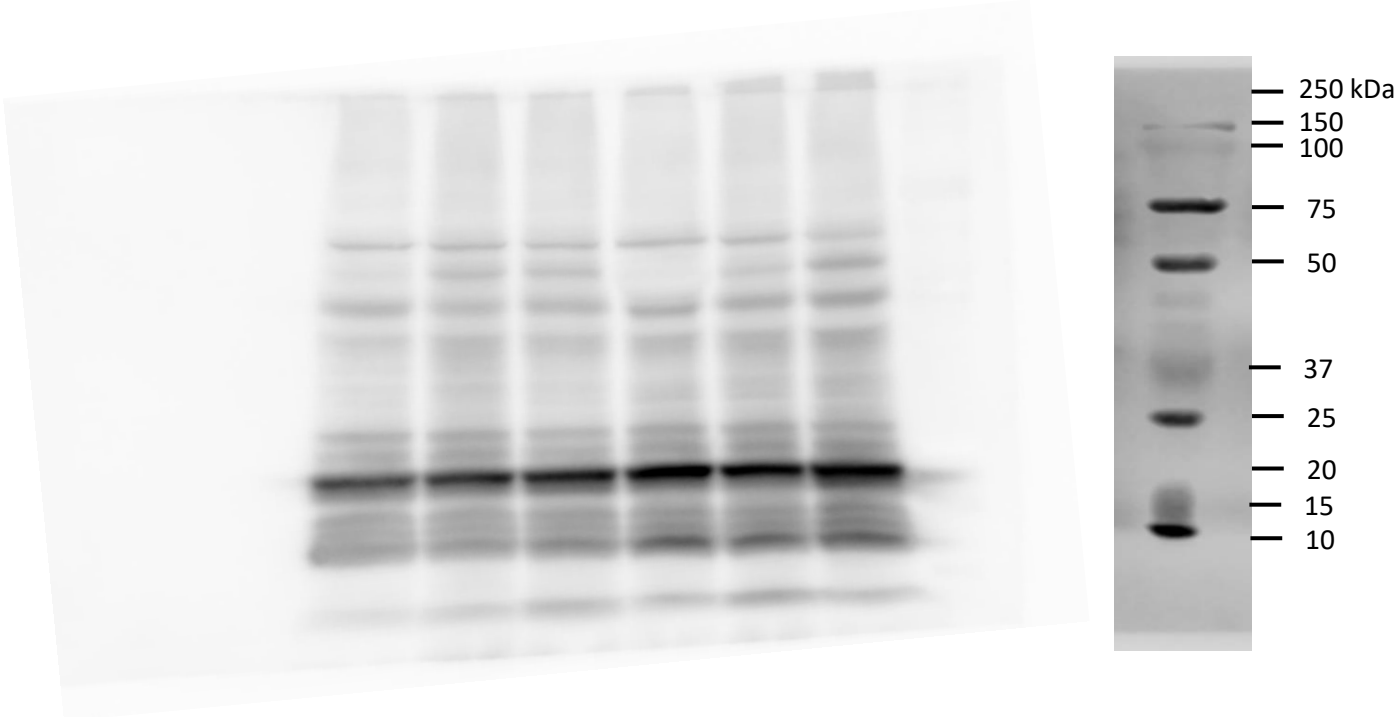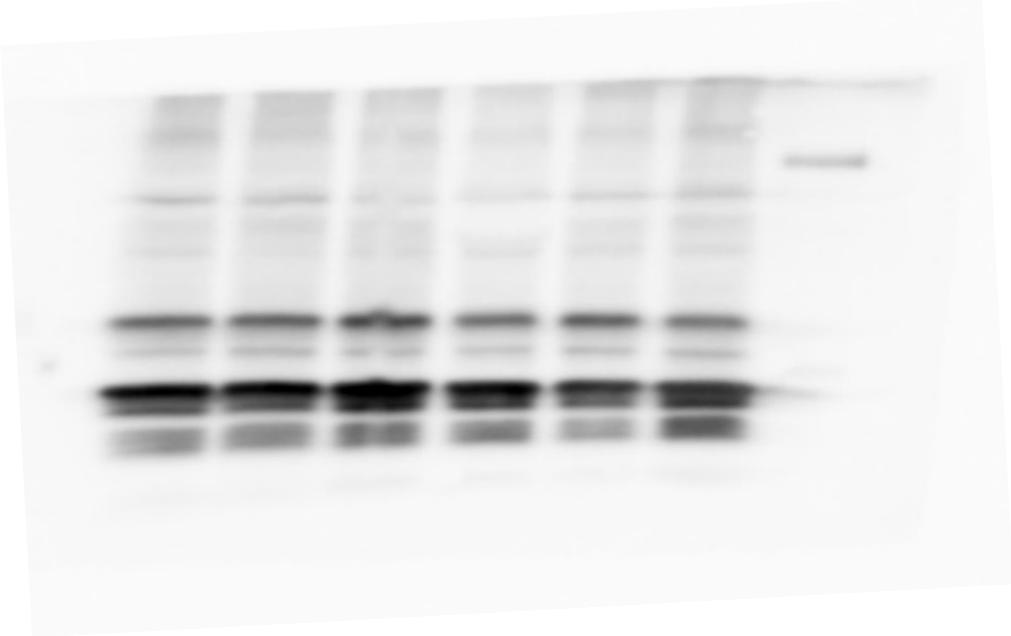

**First replicate loading control**

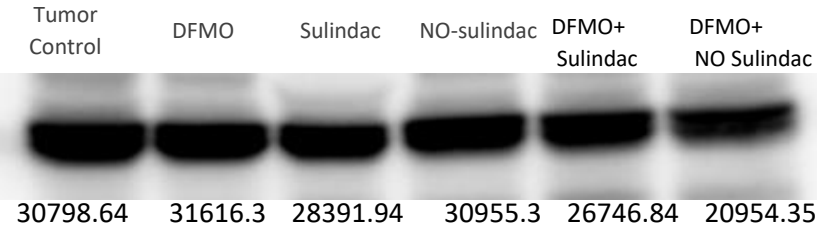

Loading control  
Normalisation  
**Fold Change**

|          |          |          |          |          |          |
|----------|----------|----------|----------|----------|----------|
| 9480.409 | 9747.221 | 13435.23 | 13635.35 | 14694.54 | 18741.05 |
| 1        | 1.028144 | 1.417157 | 1.438266 | 1.54999  | 1.976819 |

**Second replicate loading control**

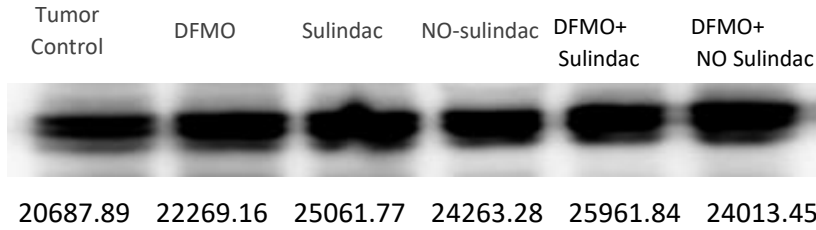

Loading control  
Normalisation  
**Fold Change**

|          |          |          |          |          |          |
|----------|----------|----------|----------|----------|----------|
| 22758.04 | 20779.49 | 20679.97 | 17726.16 | 13090.44 | 13997.13 |
| 1        | 0.913062 | 0.908689 | 0.778897 | 0.575201 | 0.615041 |

|                  |                    |          |          |          |          |          |
|------------------|--------------------|----------|----------|----------|----------|----------|
| <b>Caspase 8</b> | <b>Fold change</b> |          |          |          |          |          |
| First Replicate  | 1                  | 1.028144 | 1.417157 | 1.438266 | 1.54999  | 1.976819 |
| Seconf replicate | 1                  | 0.913062 | 0.908689 | 0.778897 | 0.575201 | 0.615041 |
| mean             | 1                  | 0.970603 | 1.162923 | 1.108581 | 1.062595 | 1.29593  |

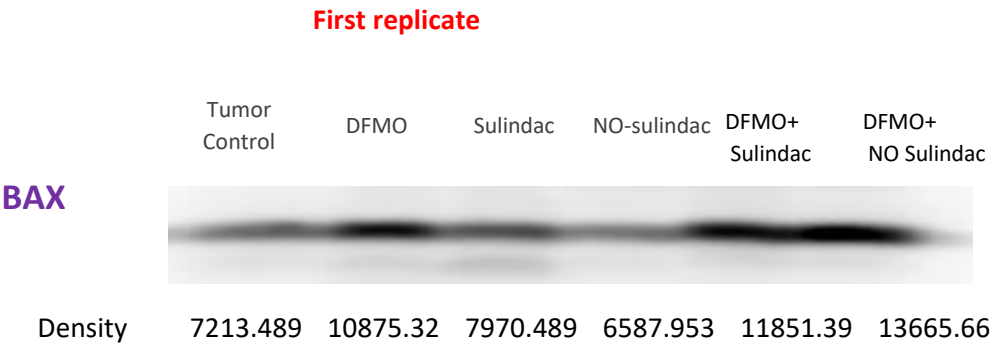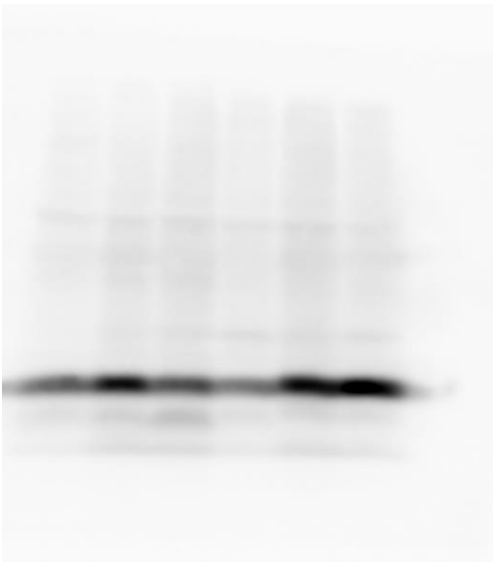

First replicate loading control

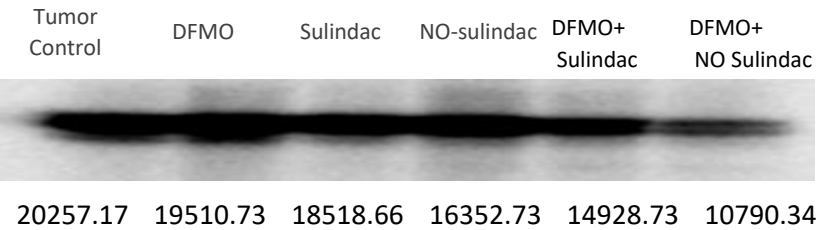

Loading control  
Normalisation

Fold Change

BAX

First Replicate

Seconf replicate

mean

Fold change

|   |          |          |          |          |         |
|---|----------|----------|----------|----------|---------|
| 1 | 1.565315 | 1.208673 | 1.131341 | 2.229357 | 3.55655 |
| 1 | 1.754081 | 0.954962 | 1.839623 | 2.748661 | 3.09975 |
| 1 | 1.659698 | 1.081817 | 1.485482 | 2.489009 | 3.32815 |

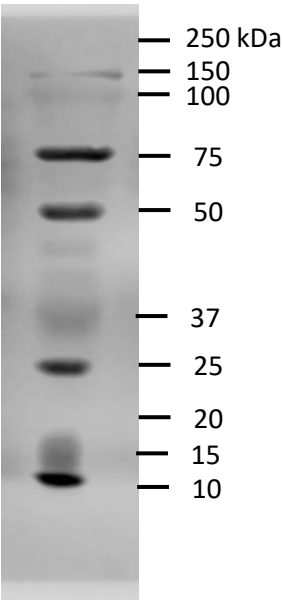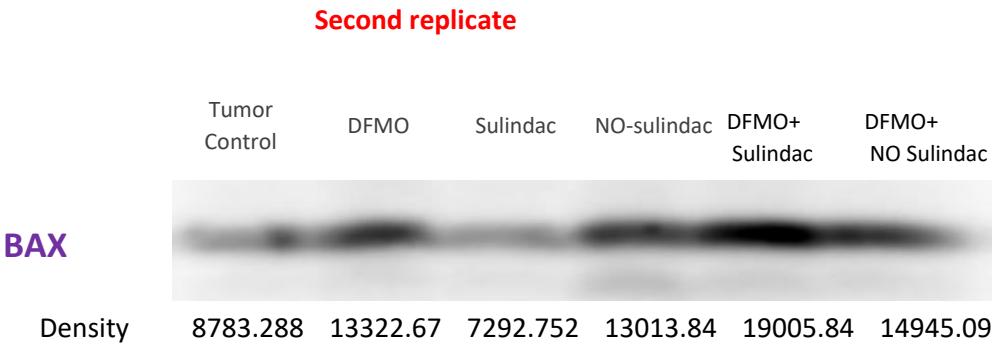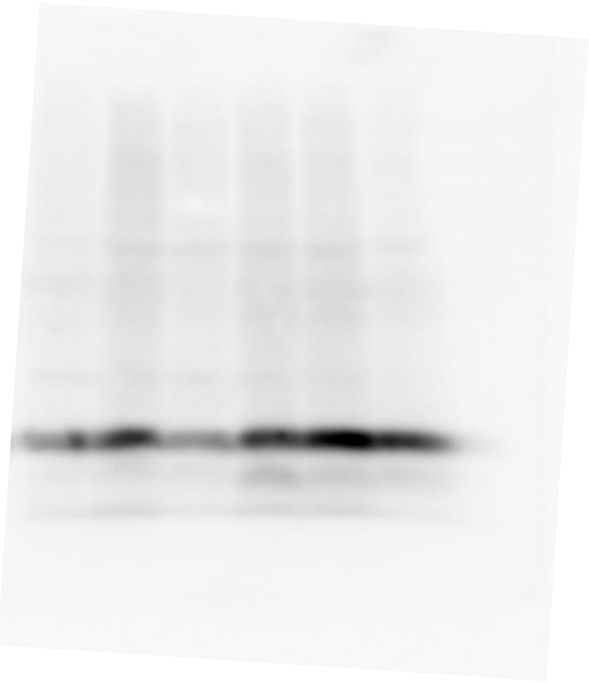

Second replicate

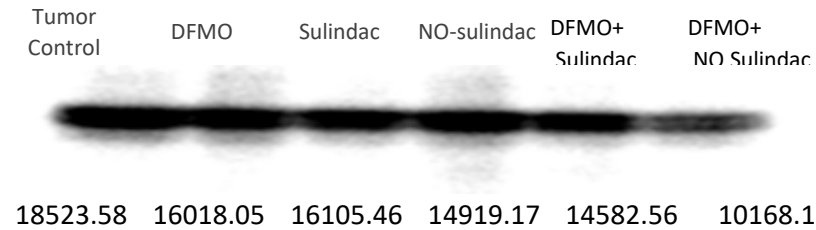

Loading control  
Normalisation

Fold Change

|          |          |          |          |          |         |
|----------|----------|----------|----------|----------|---------|
| 8783.288 | 15406.6  | 8387.708 | 16157.94 | 24142.28 | 27226   |
| 1        | 1.754081 | 0.954962 | 1.839623 | 2.748661 | 3.09975 |

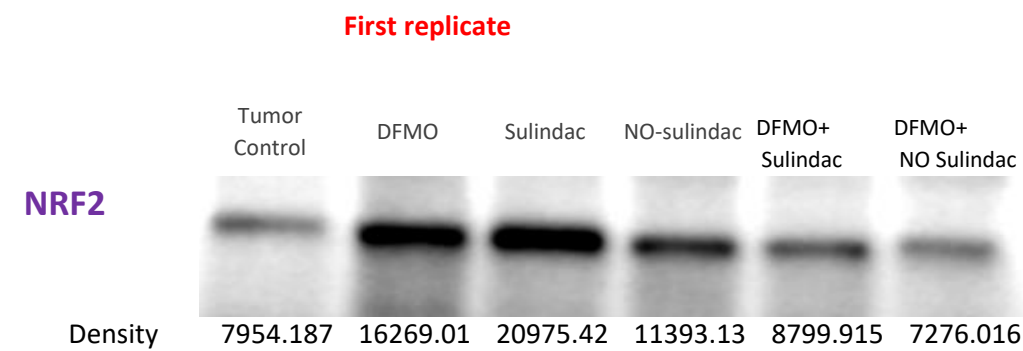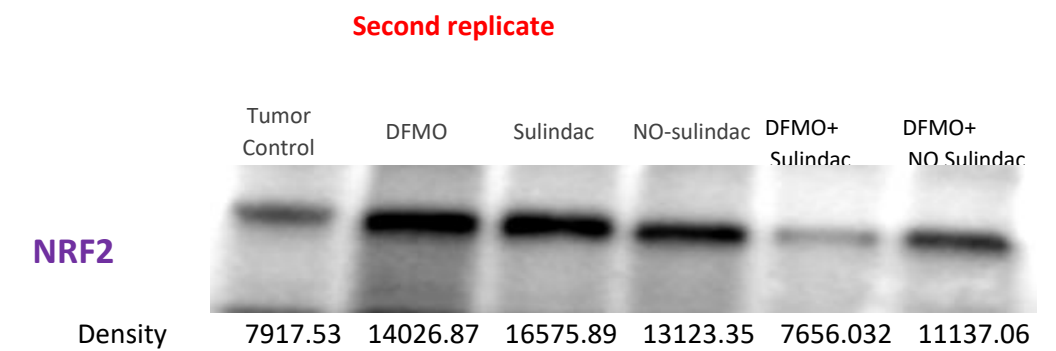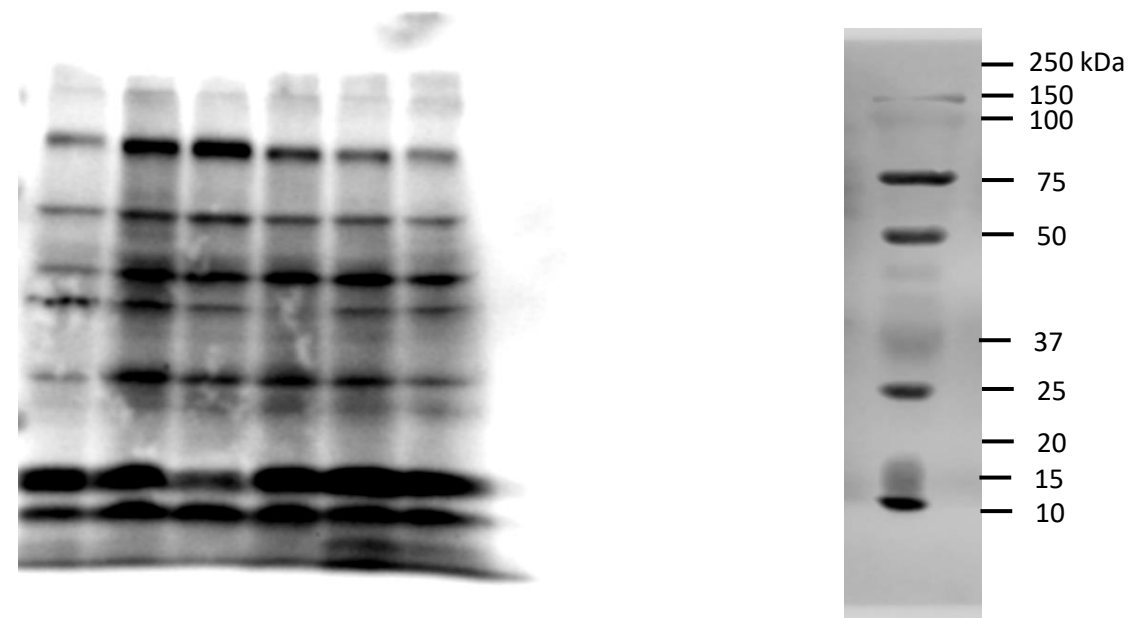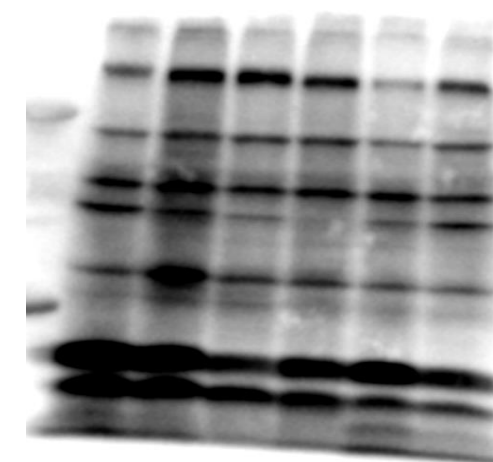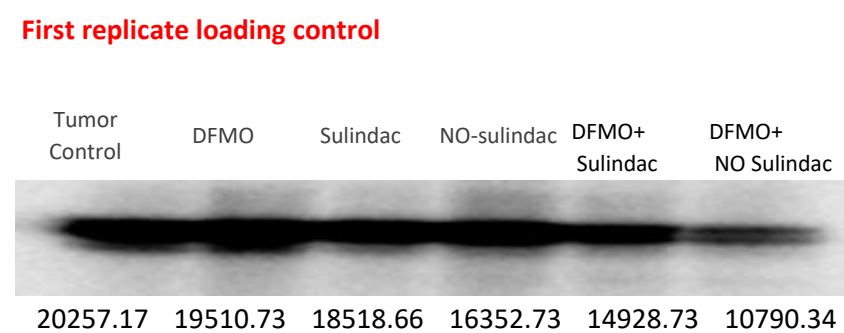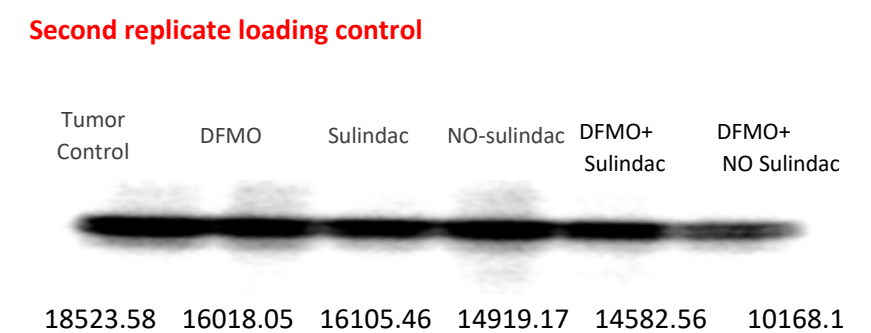

|                    |          |          |          |          |          |          |
|--------------------|----------|----------|----------|----------|----------|----------|
| Loading control    |          |          |          |          |          |          |
| Normalisation      |          |          |          |          |          |          |
|                    | 7954.187 | 16891.42 | 22944.57 | 14113.39 | 11940.82 | 13659.58 |
| <b>Fold Change</b> | 1        | 2.123589 | 2.88459  | 1.774335 | 1.5012   | 1.717282 |
| <b>NRF2</b>        |          |          |          |          |          |          |
| First Replicate    | 1        | 2.123589 | 2.88459  | 1.774335 | 1.5012   | 1.717282 |
| Second replicate   | 1        | 2.048738 | 2.407902 | 2.057953 | 1.228302 | 2.562513 |
| mean               | 1        | 2.086163 | 2.646246 | 1.916144 | 1.364751 | 2.139897 |

|                    |         |          |          |          |          |          |
|--------------------|---------|----------|----------|----------|----------|----------|
| Loading control    |         |          |          |          |          |          |
| Normalisation      |         |          |          |          |          |          |
|                    | 7917.53 | 16220.94 | 19064.64 | 16293.9  | 9725.119 | 20288.77 |
| <b>Fold Change</b> | 1       | 2.048738 | 2.407902 | 2.057953 | 1.228302 | 2.562513 |



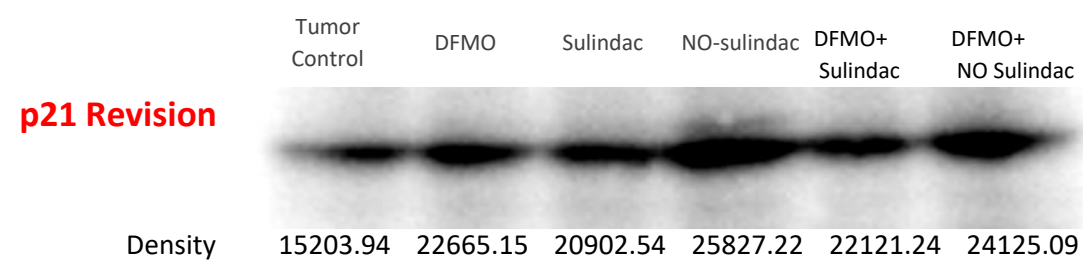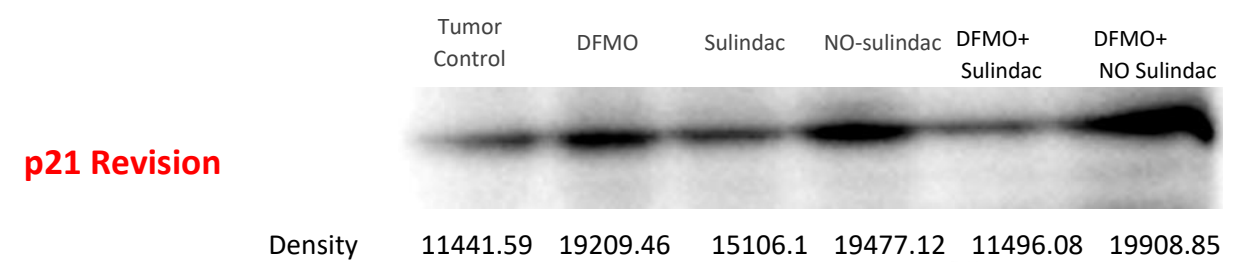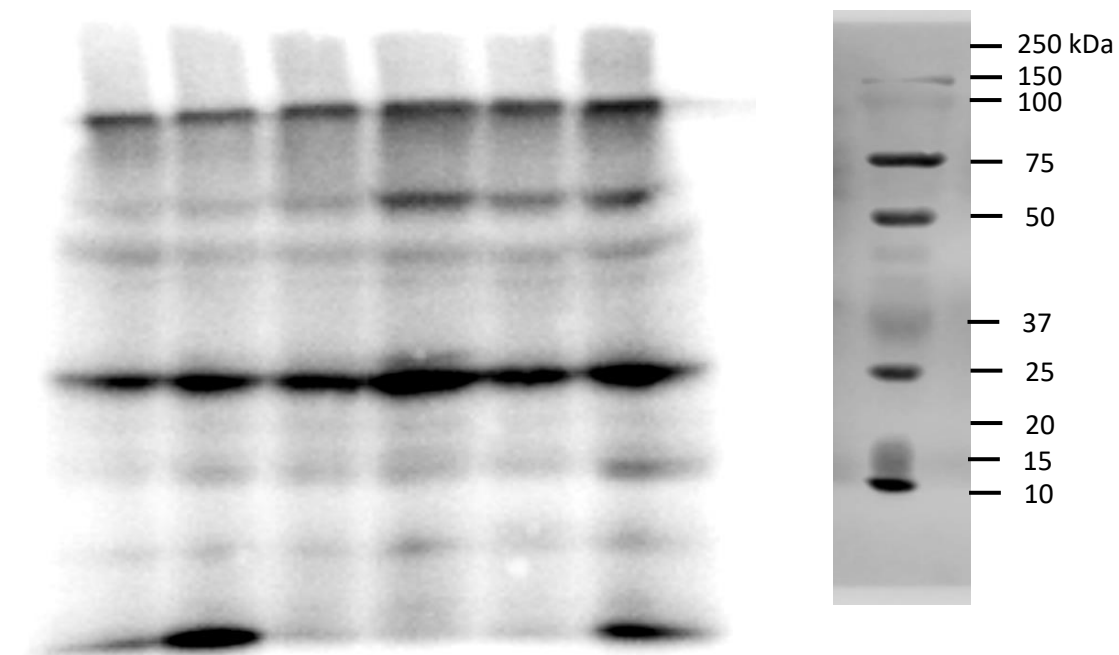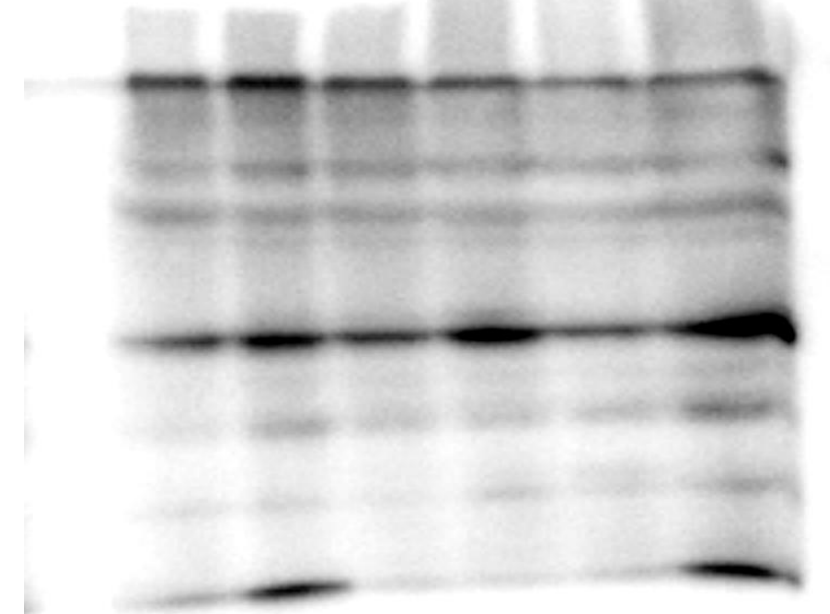

**First replicate loading control**

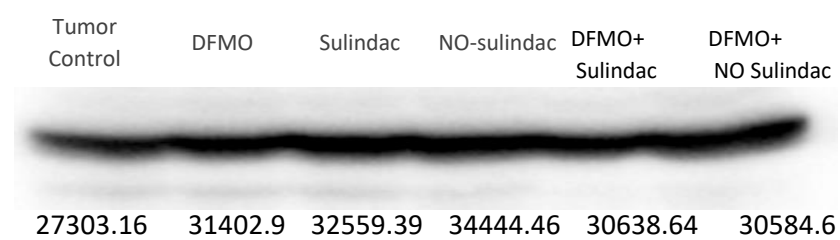

**Second replicate loading control**

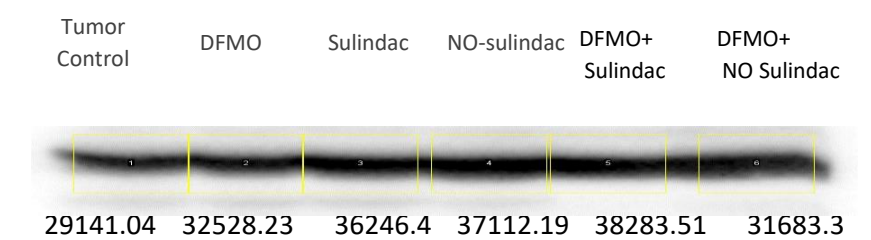

Loading  
control  
Normalisa  
tion

**Fold Change**

**p21 Revision**

First Replicate

Seconf replicate

mean

**Fold change**

|   |          |          |          |          |          |
|---|----------|----------|----------|----------|----------|
| 1 | 1.296122 | 1.152868 | 1.346527 | 1.296573 | 1.416521 |
| 1 | 1.504088 | 1.061466 | 1.336678 | 0.764815 | 1.600421 |
| 1 | 1.400105 | 1.107167 | 1.341602 | 1.030694 | 1.508471 |

Loading  
control

Normalisa

tion

**Fold Change**

|   |          |          |          |          |          |
|---|----------|----------|----------|----------|----------|
| 1 | 1.504088 | 1.061466 | 1.336678 | 0.764815 | 1.600421 |
|---|----------|----------|----------|----------|----------|
